# Supplementary material for: Short-term Cold Acclimation Recruits Brown Adipose Tissue in Obese Humans
Source: Oxford University Press journal article supplement (doi:10.2337/db15-1372), 2015-12-30

## SUPPLEMENTARY DATA

**Supplementary Figure 1. Analysis of [<sup>18</sup>F]FDG uptake in subcutaneous and visceral WAT regions.** (A) VOIs (1.33 cm<sup>3</sup> per VOI) placed in the dorsolumbar subcutaneous WAT region near vertebrae L-3, as well as in the abdominal subcutaneous WAT region in the same transversal slice (total VOI volume both 8 cm<sup>3</sup>). (B-F) VOIs (1.33 cm<sup>3</sup> per VOI) placed in visceral WAT regions: (B) the omental WAT region at the level of spleen and stomach; (C) behind the xipoid; (D) the paracolic WAT region; (E, F) the infrarenal WAT region, left (E) and right (F).

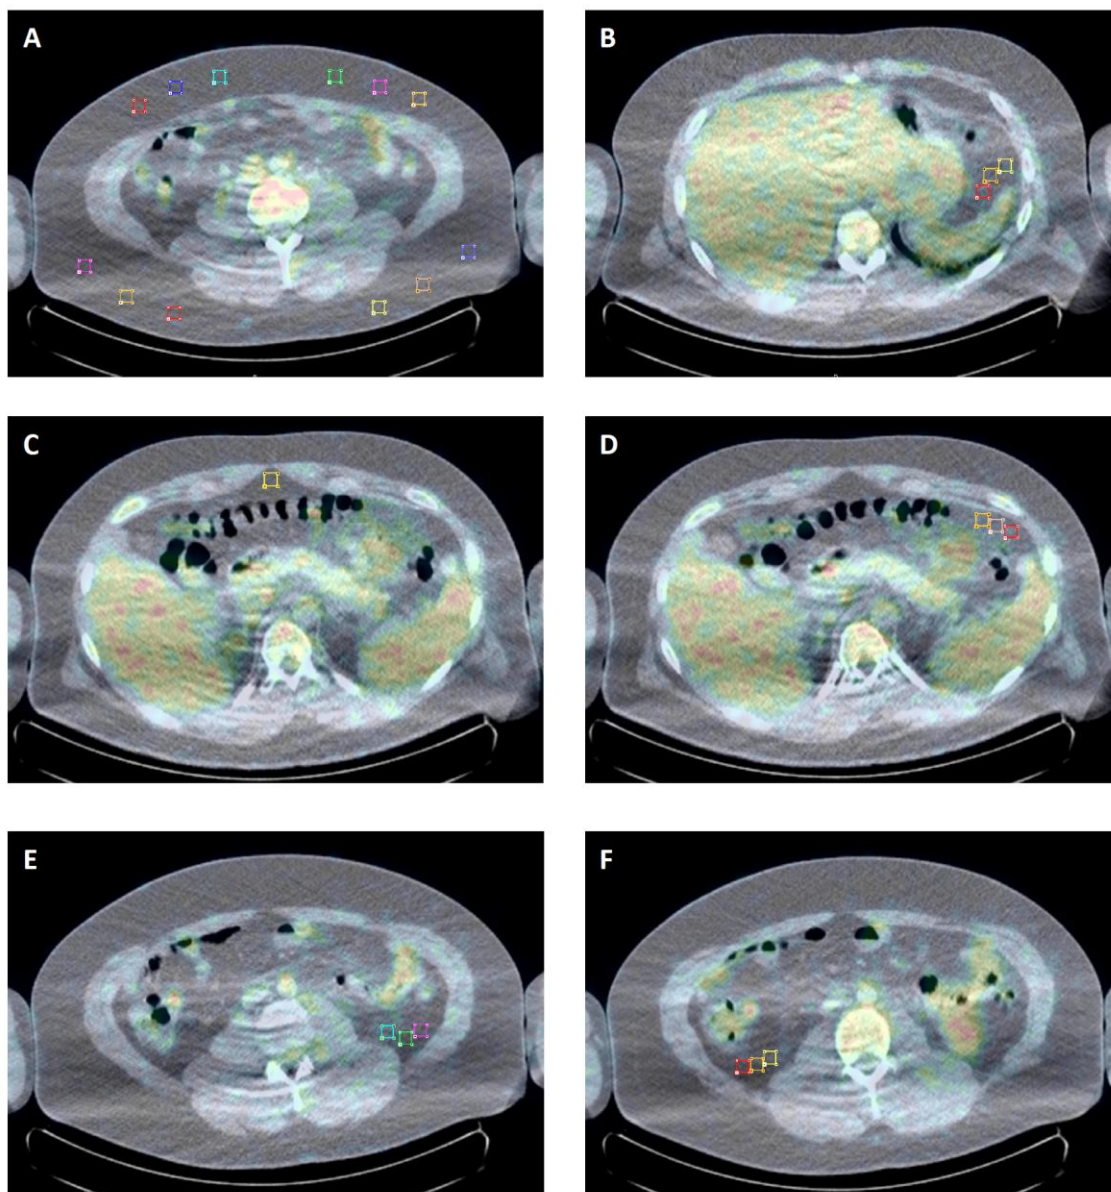

Supplement: db151372supplementarydata.pdf [file db151372supplementarydata.pdf]
